# Supplementary material
Source: PubMed Central journal article supplement (PMC2852939)

## SUPPLEMENTAL MATERIAL

MS ID#: JBC/2009/055004

MS TITLE: **High-temperature requirement A3 (HtrA3) promotes etoposide- and cisplatin-induced cytotoxicity in lung cancer cell lines**

### SUPPLEMENTAL FIGURE LEGENDS

SUPPLEMENTAL FIGURE 1. **HtrA3 modulates half maximal inhibitory concentrations (IC<sub>50</sub>) for etoposide and cisplatin treatment in lung cancer cell lines.** *A-B*, Mean IC<sub>50</sub> and 95% confidence intervals for etoposide (*A*) and cisplatin (*B*) with exogenous expression of HtrA3 variants and vector control. *C-D*, Mean IC<sub>50</sub> and 95% confidence intervals for etoposide (*C*) or cisplatin (*D*) with endogenous HtrA3 expression or with HtrA3 downregulation. *E-F*, Mean IC<sub>50</sub> and 95% confidence intervals for etoposide (*E*) or cisplatin (*F*) with re-expression of HtrA3 variants and vector control.

SUPPLEMENTAL FIGURE 2. **HtrA3 expression is induced by etoposide and cisplatin.** *A*, Immunoblots showing induction of HtrA3 expression with 20  $\mu$ M etoposide for 24 hours in the human bronchial cell line BEAS-2B and in lung cancer cell lines Hop62 and HCC827.  $\beta$ -actin shows equal loading. Densitometric analysis of fold changes in HtrA3 intensity normalized by  $\beta$ -actin loading controls is given for each cell line. *B-C*, Immunoblots showing gradual induction of HtrA3 expression with 5  $\mu$ M etoposide (*B*) or cisplatin (*C*) treatment in Hop62 and HCC827 over 72 hours. Densitometric analysis of fold changes in HtrA3 intensity normalized by  $\beta$ -actin loading controls is represented graphically for each cell line.

SUPPLEMENTAL FIGURE 3. **HtrA3 is upregulated and cleaved with etoposide and cisplatin treatment in H526.** *A-B*, Immunoblots showing induction of HtrA3 expression and with 5  $\mu$ M etoposide (*A*) or cisplatin (*B*) treatment in lung cancer cell line H526. HtrA3 is cleaved following 24 hours of treatment, resulting in the appearance of a 35 kDa cleavage product.  $\beta$ -actin shows equal loading. *C*, Immunoblots showing HtrA3 induction and cleavage with etoposide treatment. Blots showing HtrA3 expression with polyclonal and monoclonal antibodies are provided for comparison. Results show that the monoclonal antibody, which was raised against the PDZ domain, is able to detect the 35 kDa cleavage product. This result implies that the cleavage product contains the PDZ domain.  $\beta$ -actin shows equal loading. *D*, Immunoblot showing induction of HtrA3 expression and HtrA3 cleavage following treatment with 5  $\mu$ M etoposide and 10  $\mu$ M of the broad-spectrum caspase inhibitor z-VAD-FMK. *E*, Immunoblot showing induction of HtrA3 expression but inhibition of cleavage following treatment with 5  $\mu$ M etoposide and 50  $\mu$ M of the serine protease inhibitor AEBSF. *F*, Analysis of apoptotic activity following HtrA3 cleavage. H526 transiently transduced with either a non-targeted vector control (normal HtrA3 expression) or an shRNA targeting the 3' UTR (HtrA3 downregulation) were treated with 5  $\mu$ M etoposide. Immunoblot shows HtrA3 expression.  $\beta$ -actin shows equal loading. Apoptotic activity was measured by annexin V labeling followed by flow microfluorimetry. Results show greater cell death following 48 hours of etoposide treatment, when the HtrA3 cleavage product was more greatly expressed than WT HtrA3, than with HtrA3 downregulation.

SUPPLEMENTAL FIGURE 4. **Bcl-2 overexpression attenuates HtrA3 translocation from mitochondria with etoposide-induced cytotoxicity.** *A*, Immunoblots showing expression of HtrA3, endogenous and S-tagged exogenous Bcl-2 and endogenous mitochondrial marker MTC02 in human bronchial cell line BEAS-2B and lung cancer cell line Hop62. HtrA3 expression was determined using an HtrA3 polyclonal antibody. Bands specific for HtrA3 expression are indicated with an asterisk (\*). Either S-tagged Bcl-2 or vector control was expressed in BEAS-2B and Hop62, which each express endogenous HtrA3.  $\beta$ -actin shows equal loading. *B*, Immunocytochemistry using an HtrA3 polyclonal antibody showing endogenous HtrA3 and MTC02 co-localization in BEAS-2B and Hop62 before and after etoposide-induced cytotoxic stress with Bcl-2 overexpression. Hoechst stain binds nuclear material.

Original magnification, x100. *C*, Immunoblots showing expression of GFP, exogenous HtrA3 variants, endogenous and S-tagged exogenous Bcl-2 and endogenous mitochondrial marker MTC02 in lung cancer cell line H157. S-tagged Bcl-2 and either pEGFP-N1-tagged wild-type or protease inactive full length HtrA3 or vector control were expressed in H157, which lacks detectable HtrA3 expression. HtrA3 expression was determined using an HtrA3 monoclonal antibody.  $\beta$ -actin shows equal loading. *D*, Immunocytochemistry showing co-localization of MTC02 and pEGFP-N1 tagged wild-type and protease inactive full length HtrA3 variants in H157 before and after etoposide treatment with Bcl-2 overexpression. Hoechst stain binds nuclear material. Original magnification, x100.

**Supplemental Table 1**

Oligonucleotides used for the production of plasmid constructs and site-directed mutagenesis

| Plasmid                                           | Oligonucleotide   | Orientation | Sequence (5' to 3')                  |                                      |
|---------------------------------------------------|-------------------|-------------|--------------------------------------|--------------------------------------|
| <i>pcDNA3.1(+)</i> myc-His A<br>Full Length HtrA3 | BsuF              | Forward     | TGAGGTGGTCATGGGGC                    |                                      |
|                                                   | NotI R            | Reverse     | GGCCGCCCCATGACCACC                   |                                      |
|                                                   | PDZ-deleted HtrA3 | KpnI F      | Forward                              | CTTGGTACCGGTC CGGAATTCCC GGGATGGGAGC |
|                                                   |                   | PDZ NotI R  | Reverse                              | GGGGCGGCCGCTTTGATCTGCTTGTCTTGAAC     |
| <i>pEGFP-N1</i><br>Full Length HtrA3              | KpnI F            | Forward     | CTTGGTACCGGTC CGGAATTCCC GGGATGGGAGC |                                      |
|                                                   | AgeI R            | Reverse     | GGGACCGGTCCCATGACCACCTCAGGTGCGATGC   |                                      |
|                                                   | PDZ-deleted HtrA3 | KpnI F      | Forward                              | CTTGGTACCGGTC CGGAATTCCC GGGATGGGAGC |
|                                                   |                   | PDZ AgeI R  | Reverse                              | GGGACCGGTCTTTGATCTGCTTGTCTTGAAC      |
| <i>S305A HtrA3 mutants</i>                        | S305A F           | Forward     | CATCAACTACGGGAACGCCGGGGACCACTGG      |                                      |
|                                                   | S305A R           | Reverse     | CCAGTGGTCCCCCGGCGTTCCCGTAGTTGATG     |                                      |

## Supplemental Table 2

### Antibodies used for immunoblotting and immunocytochemistry

| Antibody                                                        | Manufacturer                                            | Application | Conditions                 |
|-----------------------------------------------------------------|---------------------------------------------------------|-------------|----------------------------|
| <b>Primary</b>                                                  |                                                         |             |                            |
| Bcl-2                                                           | Dako (Carpinteria, CA, USA)                             | IB          | 1:500 in 3% BSA/.1% TBST   |
| β-actin                                                         | Sigma-Aldrich (St. Louis, MO, USA)                      | IB          | 1:5000 in 3% BSA/.1% TBST  |
| Caspase 7                                                       | BD Pharmingen (San Jose, CA, USA)                       | IB          | 1:1000 in 3% BSA/.1% TBST  |
| Cleaved Caspase 3                                               | Cell Signaling Technology (Beverly, MA, USA)            | IB          | 1:500 in 3% BSA/.1% TBST   |
| Cytochrome c                                                    | BD Pharmingen (San Jose, CA, USA)                       | IB          | 1:200 in 3% BSA/.1% TBST   |
| HtrA2 (V-12)                                                    | Santa Cruz Biotechnology (Santa Cruz, CA, USA)          | IB          | 1:200 in 3% BSA/.1% TBST   |
| HtrA3 monoclonal                                                | Mayo Antibody Core Facility Rochester (MACFR)           | IB          | 1:200 in 3% BSA/.1% TBST   |
| HtrA3 polyclonal                                                | Abcam (Cambridge, MA, USA)                              | IB          | 1:200 in 3% BSA/.1% TBST   |
|                                                                 |                                                         | ICC         | 1:1000 in 3% BSA/.1% TBST  |
| Frataxin*                                                       | Pacific Immunology Corp. (Ramona, CA, USA)              | IB          | 1:5000 in 5% NFDm/.1% PBST |
| GFP (FL)                                                        | Santa Cruz Biotechnology (Santa Cruz, CA, USA)          | IB          | 1:200 in 3% BSA/.1% TBST   |
| Mitochondrial Marker MTC 02                                     | Abcam (Cambridge, MA, USA)                              | IB          | 1:200 in 3% BSA/.1% TBST   |
|                                                                 |                                                         | ICC         | 1:1000 in 3% BSA/.1% TBST  |
| MMP7                                                            | Abcam (Cambridge, MA, USA)                              | IB          | 1:200 in 3% BSA/.1% TBST   |
| S-tag**                                                         | Mayo Antibody Core Facility Rochester (MACFR)           | IB          | 1:1000 in 3% BSA/.1% TBST  |
| <b>Secondary</b>                                                |                                                         |             |                            |
| Anti-mouse IgG (whole molecule)-TRITC antibody produced in goat | Sigma-Aldrich (St. Louis, MO, USA)                      | ICC         | 1:1000 in 3% BSA/.1% TBST  |
| Anti-rabbit IgG (whole molecule)-FITC antibody produced in goat | Sigma-Aldrich (St. Louis, MO, USA)                      | ICC         | 1:1000 in 3% BSA/.1% TBST  |
| Donkey anti-rabbit IgG, HRP-linked (whole antibody)             | GE Healthcare UK (Little Chalfont, Buckinghamshire, UK) | IB          | 1:7500 in 5% NFDm/.1% TBST |
| Rabbit anti-goat IgG (H&L) F(ab') <sub>2</sub> , HRP-linked     | Millipore (Billerica, MA, USA)                          | IB          | 1:7500 in 5% NFDm/.1% TBST |
| Sheep anti-mouse IgG, HRP-linked (whole antibody)               | GE Healthcare UK (Little Chalfont, Buckinghamshire, UK) | IB          | 1:7500 in 5% NFDm/.1% TBST |

Abbreviations: IB, immunoblotting; ICC, immunocytochemistry; HRP, horse radish peroxidase; NFDm, non-fat dry milk

\*The frataxin antibody was provided by Grazia Isaya.

\*\*The S-tag antibody was provided by Scott Kaufmann (Hackbarth, Lee et al. 2004).

### Supplemental Table 3

Half maximal inhibitory concentrations ( $IC_{50}$ ) and 95% confidence intervals for etoposide and cisplatin with varying HtrA3 expression in lung cancer cell lines

| Sample                                                                                                                                | Etoposide                       |                         | Cisplatin                       |                         |
|---------------------------------------------------------------------------------------------------------------------------------------|---------------------------------|-------------------------|---------------------------------|-------------------------|
|                                                                                                                                       | $IC_{50} \pm SEM^*$ ( $\mu M$ ) | 95% Confidence Interval | $IC_{50} \pm SEM^*$ ( $\mu M$ ) | 95% Confidence Interval |
| <i>(A) Half maximal inhibitory concentrations of etoposide and cisplatin with HtrA3 overexpression in H157 and A549</i>               |                                 |                         |                                 |                         |
| <i>i. H157</i>                                                                                                                        |                                 |                         |                                 |                         |
| Vector                                                                                                                                | 35.94 $\pm$ 1.108               | 28.99 - 44.57           | 32.96 $\pm$ 1.068               | 28.71 - 37.85           |
| Full Length                                                                                                                           | 8.898 $\pm$ 1.111               | 7.136 - 11.09           | 8.721 $\pm$ 1.040               | 8.036 - 9.464           |
| Full Length S305A                                                                                                                     | 47.59 $\pm$ 1.180               | 33.72 - 67.15           | 23.91 $\pm$ 1.080               | 20.37 - 28.07           |
| Mac25-deleted                                                                                                                         | 5.301 $\pm$ 1.120               | 4.180 - 6.723           | 8.018 $\pm$ 1.132               | 6.183 - 10.40           |
| Mac25-deleted S305A                                                                                                                   | 25.89 $\pm$ 1.089               | 21.64 - 30.97           | 20.93 $\pm$ 1.086               | 17.63 - 24.85           |
| PDZ-deleted                                                                                                                           | 14.38 $\pm$ 1.078               | 12.29 - 16.82           | 11.94 $\pm$ 1.107               | 9.657 - 14.76           |
| PDZ-deleted S305A                                                                                                                     | 27.38 $\pm$ 1.072               | 23.67 - 31.67           | 23.46 $\pm$ 1.129               | 18.19 - 30.26           |
| <i>ii. A549</i>                                                                                                                       |                                 |                         |                                 |                         |
| Vector                                                                                                                                | 46.34 $\pm$ 1.127               | 36.07 - 59.53           | 55.42 $\pm$ 1.200               | 40.72 - 75.42           |
| Full Length                                                                                                                           | 8.383 $\pm$ 1.200               | 5.766 - 12.19           | 17.20 $\pm$ 1.078               | 14.72 - 20.11           |
| Full Length S305A                                                                                                                     | 35.33 $\pm$ 1.094               | 29.26 - 42.67           | 50.85 $\pm$ 1.120               | 40.11 - 64.48           |
| Mac25-deleted                                                                                                                         | 6.486 $\pm$ 1.185               | 4.544 - 9.259           | 15.06 $\pm$ 1.093               | 12.51 - 18.12           |
| Mac25-deleted S305A                                                                                                                   | 28.97 $\pm$ 1.1185              | 22.92 - 36.62           | 35.35 $\pm$ 1.082               | 29.99 - 41.67           |
| PDZ-deleted                                                                                                                           | 11.93 $\pm$ 1.176               | 8.490 - 16.76           | 18.97 $\pm$ 1.092               | 15.78 - 22.81           |
| PDZ-deleted S305A                                                                                                                     | 30.71 $\pm$ 1.300               | 17.85 - 52.82           | 52.74 $\pm$ 1.080               | 44.89 - 61.96           |
| <i>(B) Half maximal inhibitory concentrations of etoposide and cisplatin with HtrA3 downregulation in Hop62 and HCC827</i>            |                                 |                         |                                 |                         |
| <i>i. Hop62</i>                                                                                                                       |                                 |                         |                                 |                         |
| Non-target control                                                                                                                    | 8.714 $\pm$ 1.138               | 6.654 - 11.41           | 9.187 $\pm$ 1.066               | 8.035 - 10.50           |
| 3'UTR shRNA                                                                                                                           | 78.38 $\pm$ 1.242               | 49.84 - 123.3           | 44.03 $\pm$ 1.133               | 33.88 - 57.22           |
| ORF shRNA                                                                                                                             | 47.63 $\pm$ 1.271               | 28.82 - 78.72           | 29.59 $\pm$ 1.132               | 22.84 - 38.34           |
| <i>ii. HCC827</i>                                                                                                                     |                                 |                         |                                 |                         |
| Non-target control                                                                                                                    | 17.85 $\pm$ 1.070               | 15.62 - 20.39           | 11.61 $\pm$ 1.080               | 9.904 - 13.62           |
| 3'UTR shRNA                                                                                                                           | 100.1 $\pm$ 1.163               | 73.00 - 137.3           | 59.60 $\pm$ 1.190               | 41.80 - 84.96           |
| ORF shRNA                                                                                                                             | 58.28 $\pm$ 1.147               | 43.71 - 77.70           | 41.55 $\pm$ 1.120               | 32.87 - 52.54           |
| <i>(C) Half maximal inhibitory concentrations of etoposide and cisplatin with HtrA3 re-expression in Hop62 3'UTR and HCC827 3'UTR</i> |                                 |                         |                                 |                         |
| <i>i. Hop62 3'UTR shRNA</i>                                                                                                           |                                 |                         |                                 |                         |
| Vector                                                                                                                                | 45.70 $\pm$ 1.203               | 31.05 - 67.24           | 42.85 $\pm$ 1.151               | 31.94 - 57.50           |
| Full Length                                                                                                                           | 8.703 $\pm$ 1.106               | 7.049 - 10.75           | 16.24 $\pm$ 1.084               | 13.71 - 19.23           |
| Full Length S305A                                                                                                                     | 48.67 $\pm$ 1.195               | 33.52 - 70.66           | 41.65 $\pm$ 1.190               | 28.93 - 59.96           |
| Mac25-deleted                                                                                                                         | 21.20 $\pm$ 3.300               | 1.777 - 252.9           | 17.74 $\pm$ 1.078               | 15.15 - 20.76           |
| Mac25-deleted S305A                                                                                                                   | 37.97 $\pm$ 1.200               | 25.95 - 55.57           | 38.68 $\pm$ 1.139               | 29.45 - 50.80           |
| PDZ-deleted                                                                                                                           | 11.73 $\pm$ 1.200               | 8.071 - 17.06           | 19.30 $\pm$ 1.141               | 14.66 - 25.42           |
| PDZ-deleted S305A                                                                                                                     | 37.28 $\pm$ 1.153               | 27.67 - 50.23           | 56.43 $\pm$ 1.306               | 32.28 - 98.63           |
| <i>ii. HCC827 3'UTR shRNA</i>                                                                                                         |                                 |                         |                                 |                         |
| Vector                                                                                                                                | 94.19 $\pm$ 1.085               | 79.40 - 111.7           | 59.42 $\pm$ 1.123               | 46.61 - 75.75           |
| Full Length                                                                                                                           | 12.77 $\pm$ 1.183               | 8.986 - 18.14           | 13.06 $\pm$ 1.109               | 10.52 - 16.22           |
| Full Length S305A                                                                                                                     | 124.0 $\pm$ 1.166               | 89.86 - 171.2           | 70.83 $\pm$ 1.156               | 52.33 - 95.86           |
| Mac25-deleted                                                                                                                         | 6.743 $\pm$ 1.209               | 4.537 - 10.02           | 11.11 $\pm$ 1.143               | 8.406 - 14.68           |
| Mac25-deleted S305A                                                                                                                   | 63.48 $\pm$ 1.101               | 51.92 - 77.62           | 60.81 $\pm$ 1.120               | 48.01 - 77.03           |
| PDZ-deleted                                                                                                                           | 15.53 $\pm$ 1.182               | 10.94 - 22.05           | 17.74 $\pm$ 1.125               | 13.88 - 22.68           |
| PDZ-deleted S305A                                                                                                                     | 92.18 $\pm$ 1.185               | 64.60 - 131.5           | 66.65 $\pm$ 1.128               | 51.84 - 85.69           |

\* Half maximal inhibitory concentrations are expressed as mean  $IC_{50} \pm$  standard error of mean (SEM)

## Supplemental Figure 1

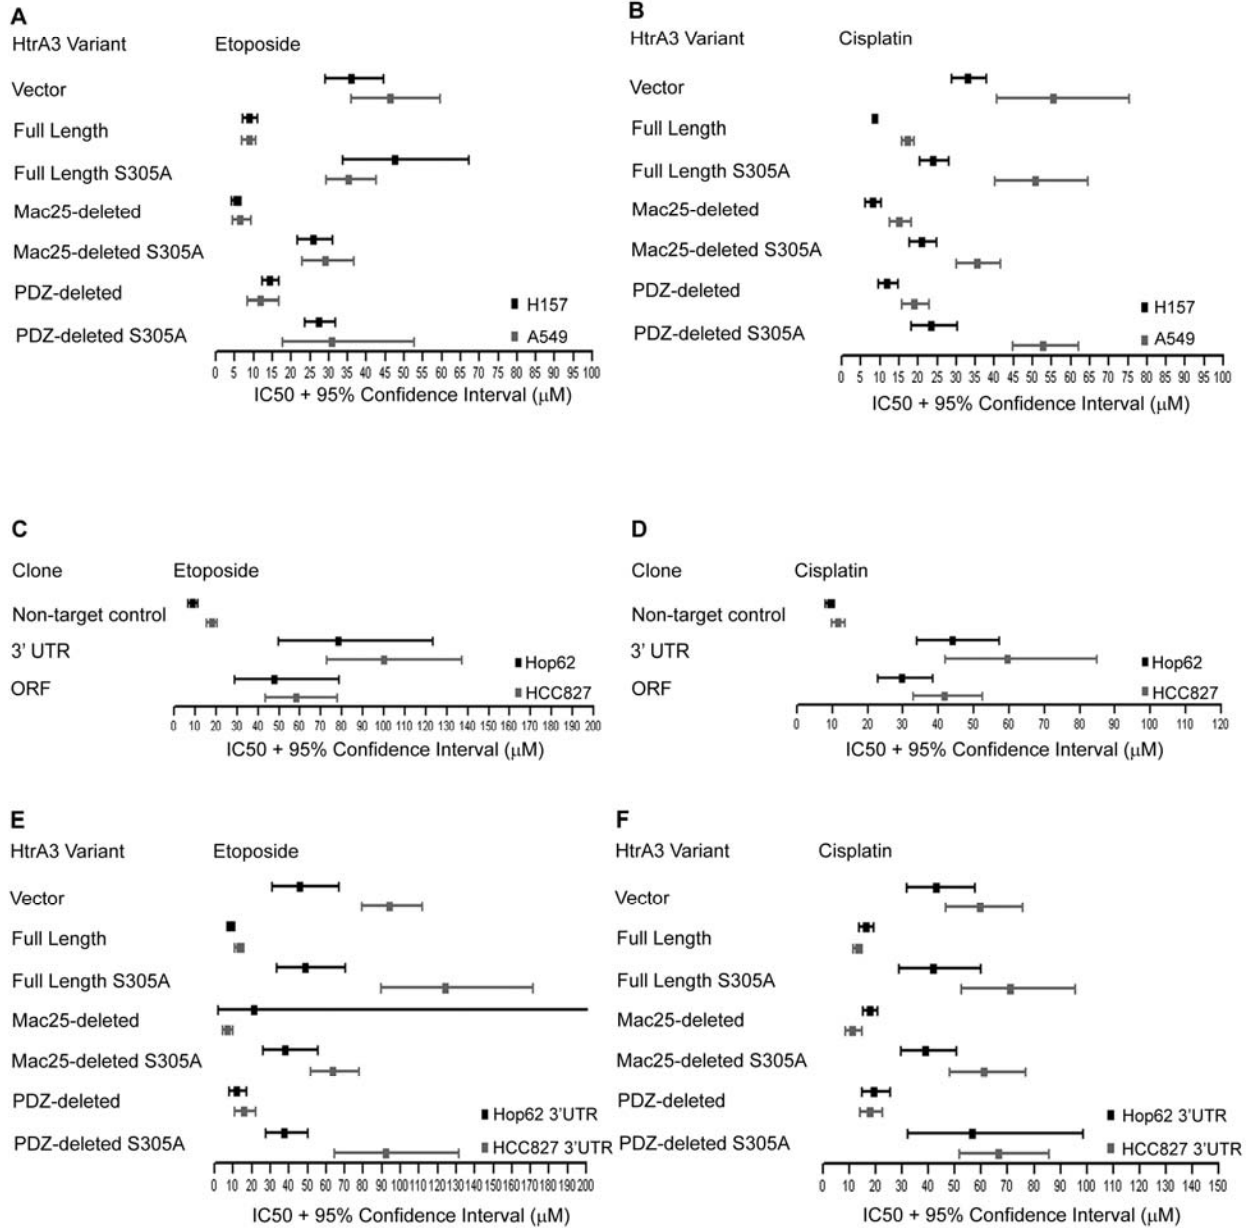

Supplemental Figure 2

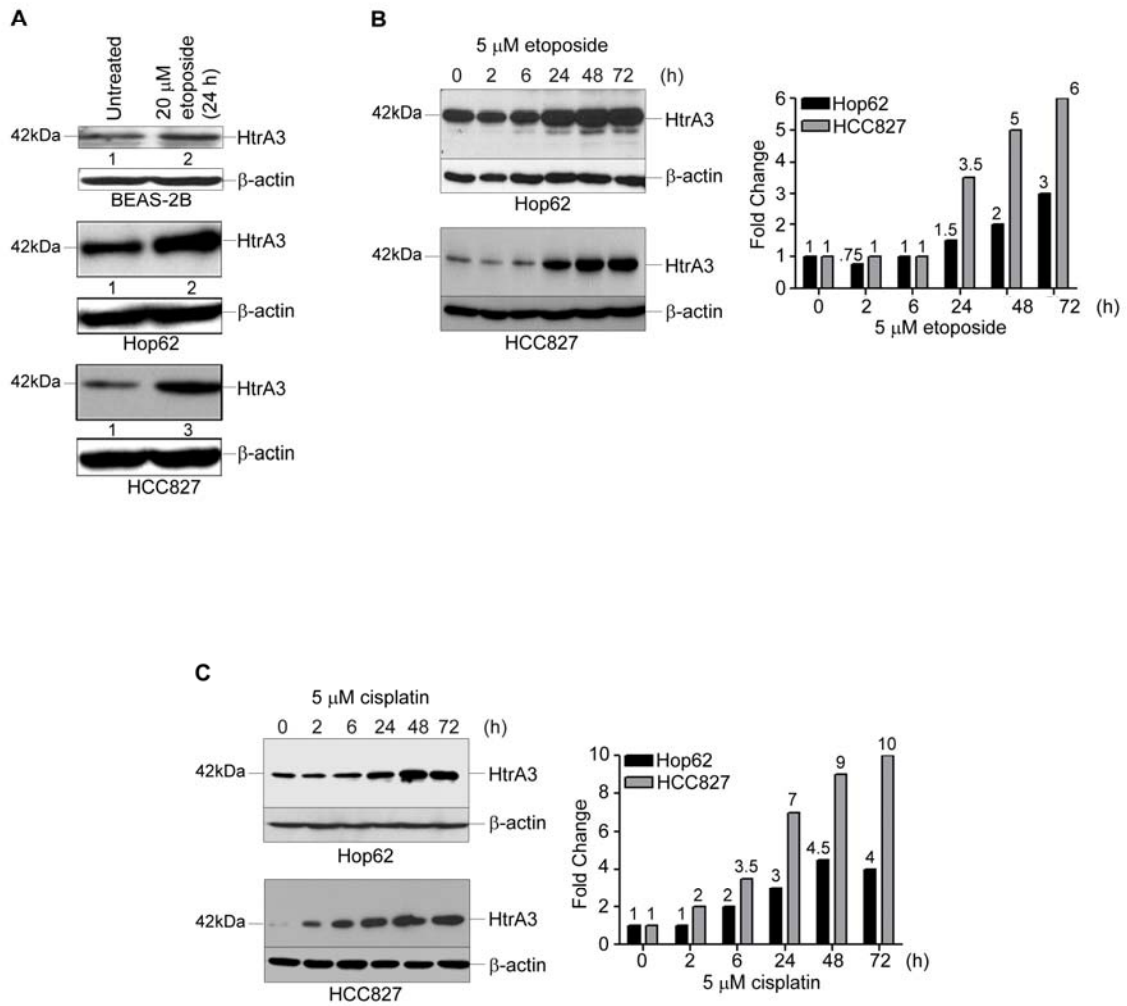

**Supplemental Figure 3**  
(continued on next page)

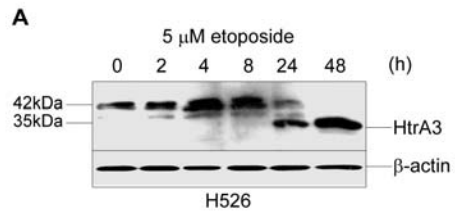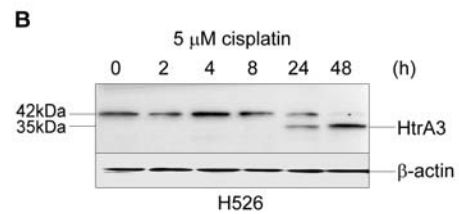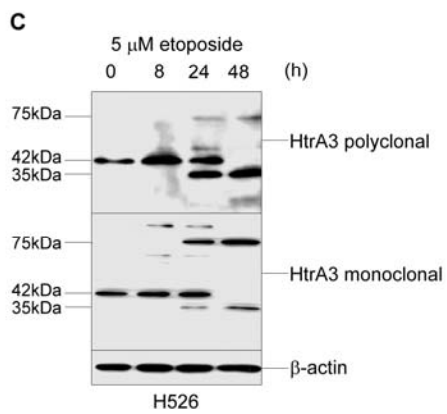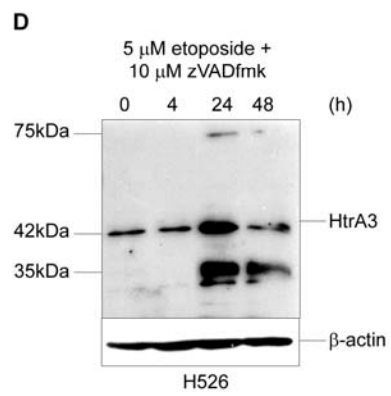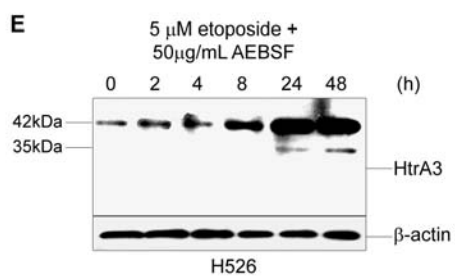



**Supplemental Figure 3**  
(continued from previous page)

**F**  
H526  
5 $\mu$ M etoposide

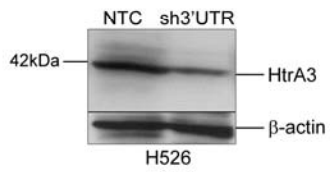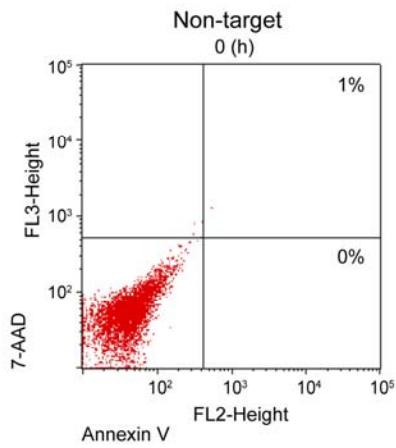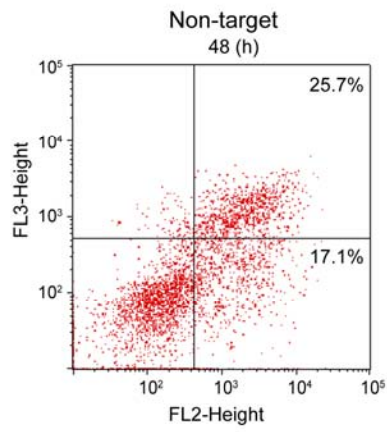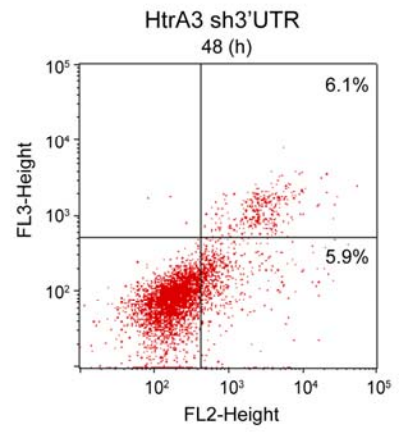

**Supplemental Figure 4**  
(continued on next page)

**A**

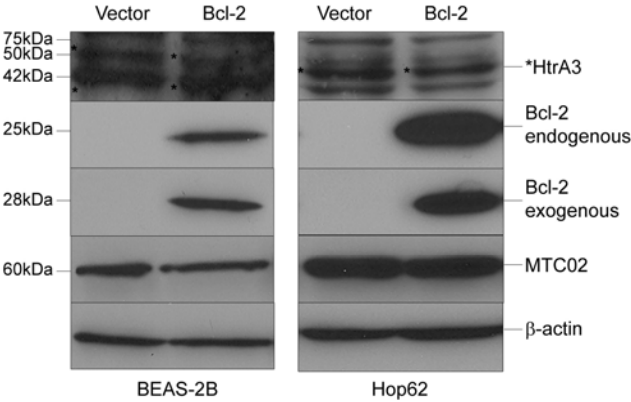

**Supplemental Figure 4**  
(continued on next page)

**B**

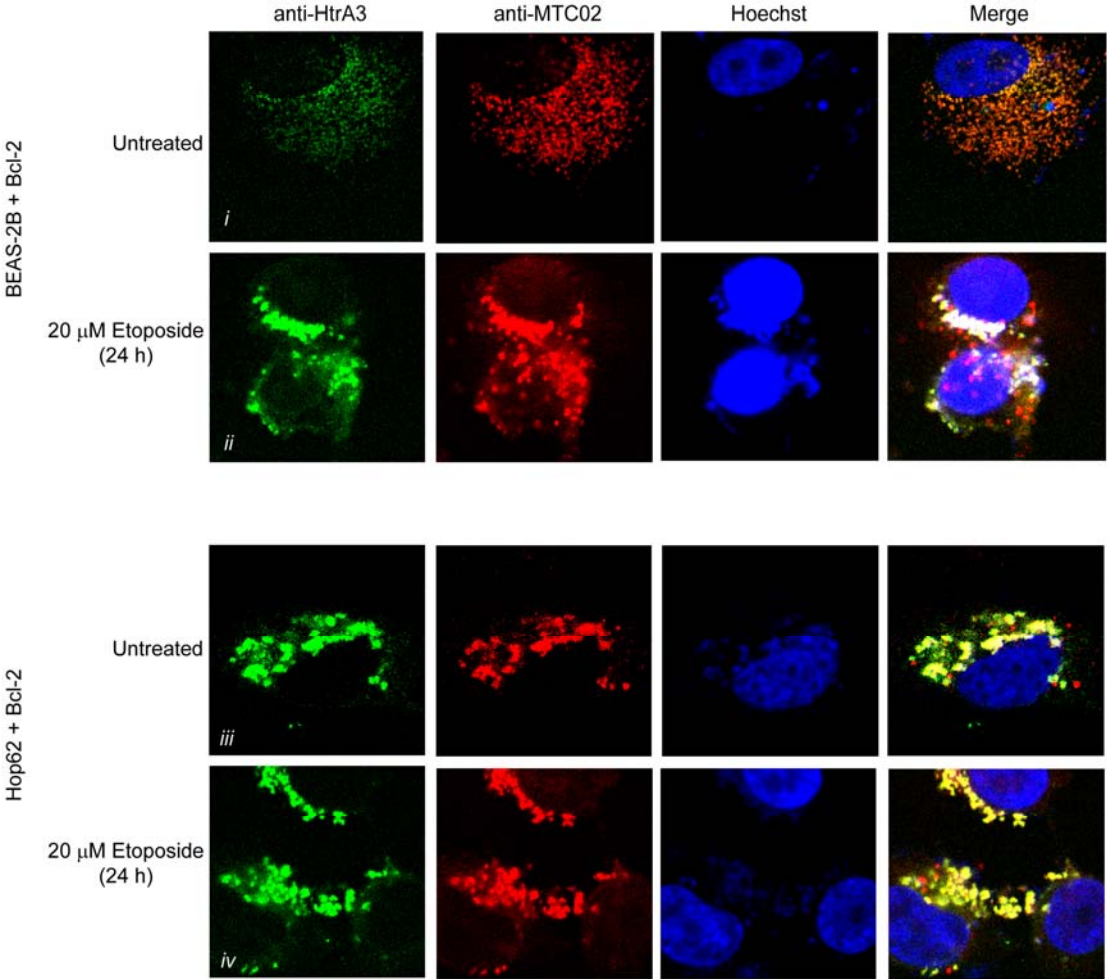

**Supplemental Figure 4**  
(continued on next page)

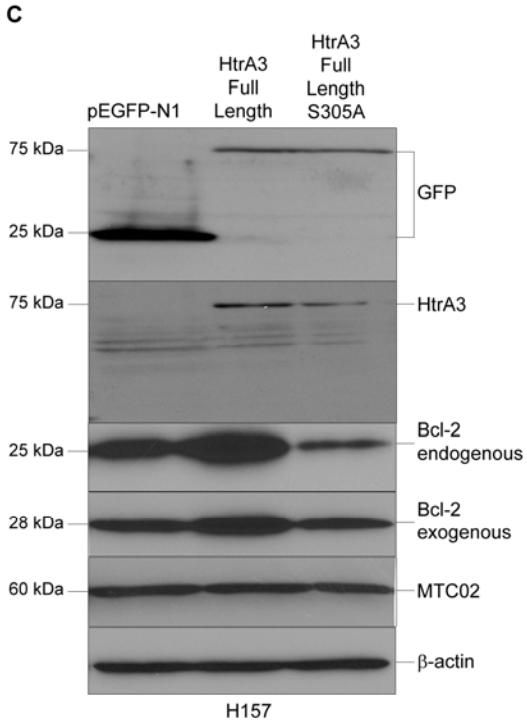

**Supplemental Figure 4**  
(continued from previous pages)

**D**  
H157  
+ Bcl-2

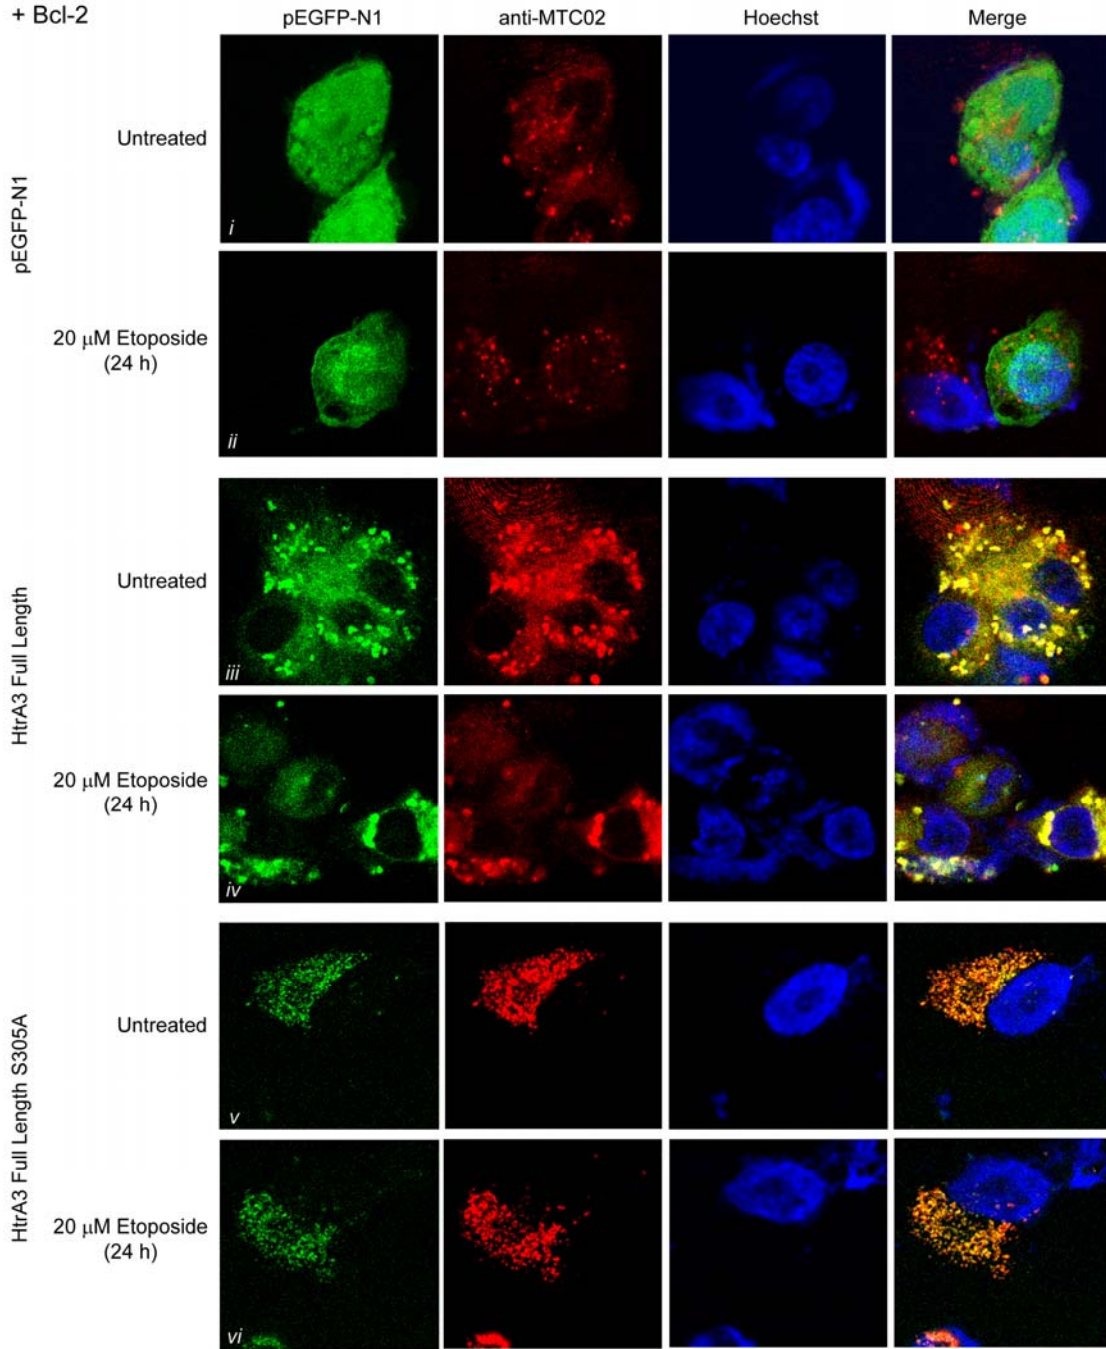

Supplement: supp_M109.097790_jbc.M109.097790-1.pdf [file supp_M109.097790_jbc.M109.097790-1.pdf]
